# Supplementary material
Source: PubMed Central journal article supplement (PMC11562977)
Supplement: sj-pdf-1-cmt-10.1177_19433875241280214.pdf [file sj-pdf-1-cmt-10.1177_19433875241280214.pdf]

# Pediatric Facial Trauma

Record ID

---

## General Patient Information

MRN

---

Hospital Location

- Atrium Main Medical Center  
 Wake Forest Baptist Medical Center

Date of Birth

---

Sex

- Male  
 Female  
 N/A

Race

- White or Caucasian  Black or African American  Hispanic/Latino  Asian/ Asian Indian  
 American Indian or Alaska Native  Native Hawaiian or Other Pacific Islander  Other  
 Declined to Answer  Unknown

City, State of Residence

---

Zip Code

---

Interpreter

- Yes  No

Primary Language Spoken (Non-English)

- Other  Spanish  Chinese  Vietnamese  French  Arabic  Korean  
 Japanese  Russian  German

Other Language Spoken

---

Height (m)

---

---

Weight (kg)

---

---

BMI

---

Positive SDOH Report

Yes  
 No

SDOH-tobacco use

Not on file  No risk  Low risk  Medium risk  High risk

SDOH-Financial Resource Strain

Not on file  No risk  Low risk  Medium risk  High risk

SDOH-Transportation Needs

Not on file  No risk  Low risk  Medium risk  High risk

SDOH-Stress

Not on file  No risk  Low risk  Medium risk  High risk

SDOH-Intimate Partner Violence

Not on file  No risk  Low risk  Medium risk  High risk

SDOH-Housing Stability

Not on file  No risk  Low risk  Medium risk  High risk

SDOH-Alcohol Use

Not on file  No risk  Low risk  Medium risk  High risk

SDOH-Food Insecurity

Not on file  No risk  Low risk  Medium risk  High risk

SDOH-Physical Activity

Not on file  No risk  Low risk  Medium risk  High risk

SDOH-Social Connections

Not on file  No risk  Low risk  Medium risk  High risk

SDOH-Depression

Not on file  No risk  Low risk  Medium risk  High risk

Transfer from Other Hospital for Advanced Care

Yes  
 No

Name of Transferring Hospital

Social Worker

- Yes  
 No  
 Unknown

Past Medical History (Pregnancy/Birth)

Not available

None

Other

Complications during birth Considered a high-risk pregnancy (Gestational diabetes, pre-eclampsia, eclampsia, maternal hypertension) Pre-natal care was not received

Time spent in NICU

 Vertically-passed infections Drug use during pregnancy/ In utero drug exposure Premature

Past Medical History (Pregnancy/Birth)

Other/Explanation

Alcohol use during pregnancy

Pertinent Past Medical History (Prior to trauma)

- Not available  
 None  
 Other  
 Type 1 diabetes  
 Type 2 diabetes  
 Genetic abnormality  
 Past physical trauma/ NAT  
 Congenital malformation  
 Intellectual developmental delay  
 Physical development delay  
 Sickle Cell/ Other Anemia  
 Syndromes  
 Cystic Fibrosis  
 Malnutrition  
 Psychiatric complaints (anxiety, depression, SI)  
 Compromised immune system  
 Cancer

Past Medical History (post-birth) Other/Explanation

Previous Surgical History

- Yes  
 No  
 Unknown

Specific Surgical History

**Trauma Injury**

Age at Trauma (years)

Initial Post-Trauma Intake Date

- 
- 
- 
- 
- 

- 
- 

---

Initial Post-Trauma Discharge Date

\_\_\_\_\_

---

Length of Hospital Stay (days) for Initial Treatment

\_\_\_\_\_

Lowest Known GCS Post-Trauma

\_\_\_\_\_

---

Mechanism of Injury

- High mechanism ( $\geq 25$ mph car accident, falls from  $\geq 10$  feet, penetrating injuries)
- Low mechanism ( $< 25$ mph car accident, falls from  $< 10$  feet, assault)

---

High Mechanism of Injury

- Other; further details
- High speed ( $\geq 25$ mph) MVA
- Extrication from MVA
- Ejection from vehicle
- Death of other vehicle occupant in MVA
- Rollover MVA
- (AGES 6-17) Fall from  $\geq 10$  ft or 5 or more steps
- Penetrating injury
- Significant blunt force trauma
- Pedestrian struck
- Significant penetration/intrusion of vehicle in MVA
- Pin-in within MVA
- Significant injury from Assault/ Non-Accidental Trauma
- (AGES 0-5) Fall from  $\geq 5$  ft or 3 or more steps

---

Type of Penetrating Injury

\_\_\_\_\_

---

Other High Mechanism of Injury

---

Vehicular Safety Devices (if applicable)

- Appropriate seatbelt use
- Inappropriate or no seatbelt use
- Child in appropriate carseat
- Child not in or not properly secured in carseat
- Airbag deployment
- No airbag deployment/none in vehicle
- Helmet worn
- No helmet

---

Low Mechanism of Injury

- Other; further details
- (AGES 6-17) Fall from < 10 ft or less than 5 steps
- Low speed (< 25mph) MVA
- Assault/ Non-Accidental Trauma
- Minor-moderate blunt force
- (AGES 0-5) Fall from < 5 ft or less than 3 steps

---

Other Low Mechanism of Injury

---

---

Type of Injuries Sustained

- Soft tissue
- Bone fracture
- Dental
- Eye
- Ear
- Tongue
- Brain
- Cervical spine/ cervical ligament injury
- Nose
- Mouth

---

Type of Soft Tissue Injury

- 
- 
- 
- 
- 
- 
- 
- 
- 
- 

- Other
- Contusion
- Abrasion
- Avulsion
- Laceration
- Hemorrhage/ Dried blood
- Hematoma/Boggy
- Crush injury
- Burn

---

Other Soft Tissue Injury

- 
- 
- 
- 
- 
- 
- 
- 
- 
- 

Location of Soft Tissue Injury

- Skin/Scalp
- Tongue
- R Eyelid
- L Eyelid
- R Eye
- L Eye
- Nose, nares
- Mouth/ lip
- R Cheek
- L Cheek
- R half Forehead
- L half Forehead
- R Ear
- L Ear
- Brain Parenchyma
- R Parietal-Occipital
- L Parietal-Occipital
- R Parietal-Temporal
- L Parietal-Temporal
- Posterior midline occiput
- Oral airway
- Chin
- R Periorbital
- L Periorbital
- Nasal septum
- Introral/gums
- Intracranial
- R Jaw/ Jaw line
- L Jaw/ Jaw line
- Philtrum (region in between nose and mouth)
- Anterior Neck
- R Lateral Neck
- L Lateral Neck
- Posterior Neck

Isolated Facial Fractures

- Yes
- No

Number of Facial Fractures Sustained

Fracture Type

- Open
- Closed



- 
- 
- 
- 
- 
- 
- 
- 
- 
- 

- Depressed
  - Transverse (horizontal pattern)
  - Oblique (angled pattern)
  - Displaced (bone out of proper alignment)
    - Non-displaced
    - Comminuted (shattered into 3+ pieces)
- Linear
  - Hairline
  - Dislocation
  - None

---

Broad Fracture Pattern

- Cranial bone (frontal, parietal, temporal, occipital, sphenoid, ethmoid, orbit roof, orbit wall)
- Mid-face (maxilla, zygomatic, nose, palatine, lacrimal, blow-out, orbit floor)
- Mandible
- Cervical Spine
- Le Forte (I,II,III)
- Non-facial cranial bone (cranial vault, skull base, basilar)
- Teeth
- Not available



- 
- 
- 
- 
- 
- 
- 
- 
- 
- 

- L Ethmoid bone
- Ethmoid bone center
- R Parieto-temporal
- L Parieto-temporal
- R Parieto-occipital
- L Parieto-occipital
- R Orbit roof
- L Orbit roof
- R Orbit wall
- L Orbit wall
- R Frontal sinus
- L Frontal sinus
- R Sphenoid sinus
- L Sphenoid sinus
- R Optic canal
- L Optic canal
- R Ethmoid sinus
- L Ethmoid sinus
- R Temporoparietal
- L Temporoparietal
- R Occipital condyle
- L Occipital condyle
- Piriform plate/crista galla
- R half Maxilla
- L half Maxilla
- Maxilla center
- R Zygomatic bone
- L Zygomatic bone
- Midline nose
- R Palatine bone
- L Palatine bone
- R Lacrimal bone

Specific Mid-Face Fracture

- 
- 
- 
- 
- 
- 
- 
- 
- 
- 
- L Lacrimal bone
- R Lamina papyracea (blow-out fx)
- L Lamina papyracea (blow-out fx)
- R Orbit floor
- L Orbit floor
- R Maxillary Sinus
- L Maxillary Sinus
- R Zygomatic arch
- L Zygomatic arch
- R Alveolar Ridge
- L Alveolar Ridge
- R Alveolar Body
- L Alveolar Body
- R Frontal Process of Maxilla
- L Frontal Process of Maxilla
- R Nasal Bone
- L Nasal Bone
- R Nasal Arch
- L Nasal Arch
- Nasal septum
- R TMJ
- L TMJ
- R pterygoid plate
- L pterygoid plate
- Nasal tip

Specific Mandible Fracture

- R body
- L body
- Center of body
- R ramus
- L ramus
- R condyle
- L condyle
- Dentoalveolar
- R head
- L head
- Midline symphysis
- R angle
- L angle
- R Parasymphysis
- L Parasymphysis

---

|                                 |                                                                                                                                                                                                                                                                                                                                                                                                                                                                                                                                                                                                   |
|---------------------------------|---------------------------------------------------------------------------------------------------------------------------------------------------------------------------------------------------------------------------------------------------------------------------------------------------------------------------------------------------------------------------------------------------------------------------------------------------------------------------------------------------------------------------------------------------------------------------------------------------|
|                                 | <input type="checkbox"/>                                                                                                                                                                                                                                                                                                                                                                                                                                                                                                                                                                          |
| Le Fort Fracture Classification | <input type="checkbox"/> R Le Fort I (horizontal injury directly inferior to nose)<br><input type="checkbox"/> R Le Fort II (pyramidal injury at nasofrontal suture)<br><input type="checkbox"/> R Le Fort III (transverse injury through ocular orbit that results in craniofacial dislocation) <input type="checkbox"/> L Le Fort I (horizontal injury directly inferior to nose)<br><input type="checkbox"/> L Le Fort II (pyramidal injury at nasofrontal suture)<br><input type="checkbox"/> L Le Fort III (transverse injury through ocular orbit that results in craniofacial dislocation) |

---

|                                  |                                                                                                                                                               |
|----------------------------------|---------------------------------------------------------------------------------------------------------------------------------------------------------------|
| Specific Non-Facial Cranial Bone | <input type="checkbox"/> Cranial vault<br><input type="checkbox"/> Skull base<br><input type="checkbox"/> Basilar<br><input type="checkbox"/> Jugular foramen |
|----------------------------------|---------------------------------------------------------------------------------------------------------------------------------------------------------------|

---

|                                                                             |                                                                                                                                                                                                                                                                                                                                                                                                                                        |
|-----------------------------------------------------------------------------|----------------------------------------------------------------------------------------------------------------------------------------------------------------------------------------------------------------------------------------------------------------------------------------------------------------------------------------------------------------------------------------------------------------------------------------|
| Concomitant Injuries Requiring Specialty Consultation on Initial Evaluation | <input type="checkbox"/> Plastic<br><input type="checkbox"/> Neurosurgery<br><input type="checkbox"/> ENT/ Otolaryngology<br><input type="checkbox"/> Ophthalmology<br><input type="checkbox"/> General Trauma/ Pediatric Trauma<br><input type="checkbox"/> Radiology<br><input type="checkbox"/> ICU/ Trauma Care<br><input type="checkbox"/> Dental experts<br><input type="checkbox"/> Pediatrics<br><input type="checkbox"/> None |
|-----------------------------------------------------------------------------|----------------------------------------------------------------------------------------------------------------------------------------------------------------------------------------------------------------------------------------------------------------------------------------------------------------------------------------------------------------------------------------------------------------------------------------|

**Treatment**

Type of Interventions/Imaging Associated with Facial Injuries

- Surgical
- Basic wound care
- Debridement
- CT
- MRI
- Ultrasound
- Admittance/ICU Monitoring
- Palliative care (OTC medication at home, ice pack)
- X-ray
- Unknown
- None
- Emergent/Prophylactic Medications
- 3D Reconstruction
- EEG

Medications Provided Post-Trauma

- Yes
- No

Post-Injury Medications

- Non-opioid pain management
- Antibiotics
- Anti-epileptics
- Anti-inflammatory
- Opioids
- Vasoconstrictors

Specific Medications Post-Injury

Number of Surgical Interventions for Facial Related Injuries

\_\_\_\_\_

Date of First Procedure

\_\_\_\_\_

Date of Last Procedure

\_\_\_\_\_

Days Following Trauma Intake Leading to First Procedure

\_\_\_\_\_

Days Following Trauma Intake Leading to Last Procedure

\_\_\_\_\_

Total Length of Procedural Treatment (in addition to day of treatment)

\_\_\_\_\_

---

Operation of Broad Facial Fracture Pattern Type

|                                                                                      |                                                         |
|--------------------------------------------------------------------------------------|---------------------------------------------------------|
| Cranial bone (frontal, parietal, temporal, occipital, sphenoid, ethmoid, orbit roof) | Mid-face (maxilla, zygomatic, nose, palatine, lacrimal) |
| Mandible                                                                             |                                                         |
|                                                                                      | Cervical                                                |
|                                                                                      | Teeth                                                   |
|                                                                                      | Soft Tissue                                             |
|                                                                                      | Other; more details                                     |





- 
- - 
  - 
  - 
  - 
  - 
  - 
  - 
  - 
  -

R Sphenoid sinus  
L Sphenoid sinus  
R Optic canal  
L Optic canal  
R Ethmoid sinus  
L Ethmoid sinus  
R Temporoparietal  
L Temporoparietal  
R Occipital condyle  
L Occipital condyle  
Piriform plate/crista galla

- 
- 
- 
- 
- 
- 
- 
- 
- 
- 

Operation of Specific Mid-Face Fracture

- R half Maxilla
- L half Maxilla
- Maxilla center
- R Zygomatic bone
- L Zygomatic bone
- Nose
- R Palatine bone
- L Palatine bone
- R Lacrimal bone

- 
- 
- 
- 
- 
- 
- 
- 
- 
- L Lacrimal bone
- R Lamina papyracea (blow-out fx)
- L Lamina papyracea (blow-out fx)
- R Orbit floor
- L Orbit floor
- R Maxillary Sinus
- L Maxillary Sinus
- R Alveolar Ridge
- L Alveolar Ridge
- R Alveolar Body
- L Alveolar Body
- R Frontal Process of Maxilla
- R Frontal Process of Maxilla
- R Nasal Bone
- L Nasal Bone
- R Nasal Arch
- L Nasal Arch
- Nasal Septum
- R TMJ
- L TMJ
- R pterygoid plate
- L pterygoid plate
- Nasal tip

Operation of Specific Mandible Fracture

- R body
- L body
- Center of body
- R ramus
- L ramus
- R condyle
- L condyle
- Dentoalveolar
- R head
- L head
- Midline symphysis
- R angle
- L angle
- R Parasymphysis
- L Parasymphysis

Operation on Soft Tissue

- Skin/Scalp
- Tongue
- R Eyelid
- L Eyelid
- R Eye
- L Eye
- Nose
- Mouth/ lip

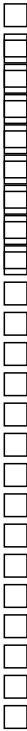

- R Cheek
- L Cheek
- R half Forehead
- L half Forehead
- R Ear
- L Ear
- Brain
- R Parietal-Occipital
- L Parietal-Occipital
- R Parietal-Temporal
- L Parietal-Temporal
- Posterior midline occiput
- Oral airway
- Chin
- R Periorbital
- L Periorbital
- Nasal septum
- R Jaw/ Jaw line
- L Jaw/ Jaw line
- Philtum
- Anterior Neck
- R Lateral Neck
- L Lateral Neck
- Posterior Neck

---

Type of Surgical Interventions Associated with Facial Injuries

- Other; more details
- Laceration repair
- Open reduction/internal fixation of facial bones
- Mandibular wiring, circummandibular wires
- Bone grafts
- Skin grafts
- Restorative dental work
- Microvascular reconstruction
- Metal/absorbable hardware for eye socket, mid-facial, or mandibular bone repair



- 
- 
- 
- 
- 
- 
- 
- 
- 
- 

Scar revision/excision  
EUA (Exam Under Anesthesia)  
Wound packing  
Nerve allograft  
CO2 Laser Treatment  
Drain placement (Penrose)  
Scar reconstruction via Z-Plasty  
Release of scar contractures

Other Types of Surgical Interventions Associated with Facial Injuries

\_\_\_\_\_

Types of Foreign Bodies Removed

\_\_\_\_\_

Specific Body Material Eviscerated/Removed

- R Eye
- L Eye

Other Additional Management

\_\_\_\_\_

GCS Post-Discharge

\_\_\_\_\_

---

**Outcomes and Post-Operative Complications**


---

Known Complications Post-Trauma

- Yes  
 No  
 Unknown
- 

Specific Post-Trauma Complications

- Other  
 Infection/Abscess  
 Scarring, scar contracture  
 Facial deformity  
 CSF leak  
 Hematoma  
 Edema  
 TBI  
 Meningitis  
 Traumatic optic neuropathy  
 Anosmia  
 Seizures  
 Chronic sinusitis  
 Cavernous sinus thrombosis  
 Cranial nerve injuries  
 Blindness  
 Alopecia  
 Hemorrhage  
 Tinnitus  
 Hearing loss  
 Developmental/ Cognitive delay  
 Airway complications, Nasal airway obstruction  
 GI complications  
 Horner's syndrome  
 Delayed healing/fracture improvement  
 Cardiac Arrest/ Death  
 Other visual/ocular impairments  
 Skull deformity  
 Hypoxic brain injury  
 Vascular injury, compromise  
 Speech delays/issues  
 Concussion  
 Cervical spine injury/paralysis  
 Psychiatric/Behavioral/Mood changes  
 Vertigo, dizziness, BPPV  
 Headaches  
 Weakness, Balance/Proprioception issues  
 Remaining foreign body material from MOI  
 Nerve pain/Neuropathy/ Numbness  
 Shock  
 Trismus/ Spasms  
 Alopecia  
 Decreased Salivation/Lacrimation  
 Facial paralysis  
 Keloid formation at trauma site  
 Encephalopathy
- 

Other Post-Trauma Complications, Specific details

\_\_\_\_\_

Known Complications Following Operation

- Yes  
 No  
 Unknown



Complication Interventions (Clavien-Dindo)

- Other
- 
- 

Grade 1 (No pharmacological or surgical treatment, endoscopic, or radiological interventions required).

- Allowed pharmacological treatment includes antiemetics, antipyretics, analgetics, diuretics, and electrolytes.

Grade 2 (Pharmacological treatment other than those allowed for Grade 1, blood transfusion, parenteral nutrition)

Grade 3a (Surgical, endoscopic, or radiological intervention not under general anesthesia) Grade 3b

(Surgical, endoscopic, or radiological intervention requiring general anesthesia) Grade 4a (Life-

threatening single organ dysfunction (including dialysis) requiring

ICU-management)

Grade 4b (Life-threatening multi-organ dysfunction requiring ICU-management) Grade 5

(Death of a patient)

---

Specific Post-Operative Complications

- Infection/Abscess
- Scarring, Scar contracture
- Facial deformity
- CSF leak
- Hematoma
- Edema
- TBI
- Meningitis
- Traumatic optic neuropathy
- Anosmia
- Seizures
- Chronic sinusitis
- Cavernous sinus thrombosis
- Cranial nerve injuries
- Blindness
- Alopecia
- Hemorrhage
- Tinnitus
- Hearing loss
- Developmental delay
- Airway complications, Nasal airway obstruction
- GI complications
- Horner's syndrome
- Delayed healing/fracture improvement
- Cardiac Arrest
- Other visual/ocular impairments
- Skull deformity
- Hypoxic brain injury
- Vascular injury, compromise
- Concussion
- Cervical spine injury/paralysis
- Remaining foreign body material from MOI
- Nerve pain/Neuropathy
- Shock
- Trismus/ Spasms
- Alopecia
- Decreased Salivation/Lacrimation
- Facial paralysis
- Keloid formation at trauma site
- Encephalopathy

---

Other Post-Operative Complications

---

Known Follow-up Outcomes

- Other
- 
- 

Unknown

No facial-related complications from trauma or interventions following trauma

Minor physical impairments (little deformity and scarring, little to no issues with cranial nerve, sensory, and motor involvement of the face) Moderate physical impairments (some deformity and scarring, issues with cranial nerve, sensory, and motor involvement of the face that have not lead to extensive impairments)

- Significant physical impairments (extensive deformity and scarring, debilitating issues with cranial nerve, sensory, and motor involvement of the face)
  - Re-admittance or ED evaluation to hospital for concomitant complications from MOI
  - Received previous evaluation, treatment, physical therapy, follow-up appointments following discharge
    - Death during hospital stay
    - Death following discharge from MOI
      - Death from other MOI
      - Lost to follow-up
    - Patient still receiving ongoing evaluation, treatment, physical therapy, follow-up appointments

Other Known Outcomes

\_\_\_\_\_

Date of Re-admittance Following Initial Trauma Discharge

\_\_\_\_\_

Date of Discharge Following New Re-admittance

\_\_\_\_\_

Total Length of New Re-admittance (in addition to day of re-admittance)

---

Days Following Initial Discharge to Re-admittance

---

Reason for Re-admittance

- Infection/Abscess
- Scarring, Scar contracture
- Facial deformity
- CSF leak
- Hematoma
- Edema
- TBI
- Meningitis
- Traumatic optic neuropathy
- Anosmia
- Seizures
- Chronic sinusitis
- Cavernous sinus thrombosis
- Cranial nerve injuries
- Blindness
- Alopecia
- Hemorrhage
- Tinnitus
- Hearing loss
- Developmental delay
- Airway complications
- GI complications
- Horner's syndrome
- Delayed healing/fracture improvement
- Cardiac Arrest
- Other visual/ocular impairments
- Skull deformity
- Hypoxic brain injury
- Vascular injury, compromise
- Concussion
- Cervical spine injury/paralysis
- Surgical procedure
- Headaches
- Vertigo/BPPV/Dizziness
- Physics therapy/ Rehabilitation

Other Reason for Re-admittance

---

Specialty Follow-Up Evaluations

- Plastic
- Neurosurgery
- ENT/Otolaryngology
- Ophthalmology
- Radiology
- Dental experts
- PCP/ Pediatrics
- Physical Therapy (PT, OT, ST)
- General Surgery

Number of Plastic Surgery Evaluations Following Discharge

---

Other

Date of Last Plastic Surgery Appointment Following Discharge

\_\_\_\_\_

Days of Plastic Surgery Evaluation/Treatment Post-Discharge Until Resolution

\_\_\_\_\_

Number of Neurosurgery Evaluations Following Discharge

\_\_\_\_\_

Date of Last Neurosurgery Appointment Following Discharge

\_\_\_\_\_

Days of Neurosurgery Evaluation/Treatment Post-Discharge Until Resolution

\_\_\_\_\_

Number of ENT Evaluations Following Discharge

\_\_\_\_\_

Date of Last ENT Appointment Following Discharge

\_\_\_\_\_

Days of ENT Evaluation/Treatment Post-Discharge Until Resolution

\_\_\_\_\_

Number of Ophthalmology Evaluations Following Discharge

\_\_\_\_\_

Date of Last Ophthalmology Appointment Following Discharge

\_\_\_\_\_

Days of Ophthalmology Evaluation/Treatment Post-Discharge Until Resolution

\_\_\_\_\_

Number of Radiology Evaluations Following Discharge

\_\_\_\_\_

---

Date of Last Radiology Appointment Following Discharge

---

---

Days of Radiology Evaluation/Treatment Post-Discharge Until Resolution

---

---

Number of Dental Expert Evaluations Following Discharge

---

---

Date of Last Dental Appointment Following Discharge

---

---

Days of Dental Expert Evaluation/Treatment Post-Discharge Until Resolution

---

---

Number of PCP/ Pediatric Evaluations Following Discharge (related to trauma)

---

---

Date of Last PCP/ Pediatric Appointment Following Discharge

---

---

Days of PCP/Pediatric Evaluation/Treatment Post-Discharge Until Resolution

---

---

Number of PT Evaluations Following Discharge (related to trauma)

---

---

Date of Last PT Appointment Following Discharge

---

---

Days of PT Evaluation/Treatment Post-Discharge Until Resolution

---

---

Number of General Surgery Evaluations Following Discharge  
(related to trauma)

---

---

Date of Last General Surgery Appointment Following Discharge

---

---

Days of General Surgery Evaluation/Treatment Post-Discharge Until  
Resolution

---

---

Management of Additional Injuries and Follow-Up  
Appointment Details

- Other; more details
- Life support
- Physical therapy
- Occlusion restoration
- Wire/hardware removal
- Airway/GI management (intubation, tracheostomy, gastrostomy)
- Speech pathology
- Cosmetic repair for deformity or scarring
- Dental rehabilitation
- Prosthetic care
- Palliative care
- Discharged
- Follow-up appointments
- Splint/cast/wound pack removal
- Additional CT
- Additional MRI
- Additional XR/Osseous survey
- Additional Ultrasound
- Vision tests
- Hearing tests/Audiogram
- EEG
- Neuro function tests
- Nerve block
- Angiogram
- Psychiatric therapy
- Drain removal

---

More Details on Post-Initial Treatment

---

**Mortality**

Suicide Attempt/ Self-Inflicted Injuries

- Yes
- No
- Unknown

Mortality

- Yes
- No
- Unknown

Date of Death

\_\_\_\_\_

Days following Last Surgical Intervention Leading to Mortality

\_\_\_\_\_

Days following Initial Trauma Leading to Mortality

\_\_\_\_\_

Mechanism of Death

- Other
- Unknown
- Due to facial trauma
- Due to concomitant injuries
- Infection
- Intracranial pressure
- Uncontrolled hemorrhage
- Airway obstruction/Respiratory failure

Other Mechanism of Death

\_\_\_\_\_

| % | County  | Zipcode | # visits     | Mean Household Unemployed | % Below Income | Poverty |
|---|---------|---------|--------------|---------------------------|----------------|---------|
|   | Forsyth | 27012   | 13           | 3.3                       | \$109,054.00   | 6.1     |
|   | 27023   | 6       | 1.6          | \$114,407.00              | 9.6            |         |
|   | 27040   | 5       | 2.5          | \$104,532.00              | 9.6            |         |
|   | 27045   | 5       | 2.3          | \$73,367.00               | 10.2           |         |
|   | 27050   | 1 2     | \$74,365.00  | 9.5                       |                |         |
|   | 27051   | 2 4     | \$65,075.00  | 11.7                      |                |         |
|   | 27101   | 11 5.3  | \$62,914.00  | 23.6                      |                |         |
|   | 27102   | 1 N/A   | N/A          | N/A                       |                |         |
|   | 27103   | 13 3    | \$71,247.00  | 15.7                      |                |         |
|   | 27104   | 9 2.9   | \$116,057.00 | 6.8                       |                |         |
|   | 27105   | 38 5.1  | \$46,893.00  | 29.8                      |                |         |
|   | 27106   | 25 2.7  | \$98,444.00  | 11.2                      |                |         |
|   | 27107   | 23 3.2  | \$68,576.00  | 23.6                      |                |         |



|          |        |             |              |              |      |
|----------|--------|-------------|--------------|--------------|------|
| 27127    | 18     | 3.4         | \$64,923.00  | 14.9         |      |
| 27284    | 16     | 2.1         | \$86,826.00  | 9.5          |      |
| Davidson | 27239  | 4           | 3.7          | \$68,945.00  | 16.4 |
| 27292    | 27     | 3.6         | \$60,050.00  | 18.6         |      |
| 27295    | 21     | 2.2         | \$69,292.00  | 10.9         |      |
| 27299    | 2      | 5.6         | \$73,815.00  | 22.2         |      |
| 27360    | 14     | 3.6         | \$62,471.00  | 17.7         |      |
| Guilford | 27214  | 1           | 2            | \$89,378.00  | 11.1 |
| 27233    | 1      | 1.2         | \$85,689.00  | 4.5          |      |
| 27235    | 4      | 2.4         | \$107,232.00 | 3.8          |      |
| 27260    | 7      | 6           | \$45,269.00  | 27.3         |      |
| 27262    | 8 4.1  | \$80,233.00 | 17.5         |              |      |
| 27263    | 10 4.2 | \$63,678.00 | 13.7         |              |      |
| 27265    | 11     | 2.7         | \$91,049.00  | 7.3          |      |
| 27301    | 2      | 1.4         | \$81,203.00  | 10.3         |      |
| 27310    | 2      | 1.6         | \$159,713.00 | 3.4          |      |
| 27313    | 2      | 2.9         | \$79,858.00  | 8.3          |      |
| 27357    | 3      | 3           | \$99,064.00  | 14.9         |      |
| 27403    | 1      | 3.6         | \$70,260.00  | 20.8         |      |
| 27405    | 6      | 4.5         | \$52,609.00  | 25           |      |
| 27358    | 5      | 3.8         | \$148,471.00 | 9.6          |      |
| 27406    | 8 4.4  | \$63,533.00 | 18.8         |              |      |
| 27407    | 9 3.1  | \$72,179.00 | 16.3         |              |      |
| 27409    | 2 5.4  | \$64,941.00 | 16.6         |              |      |
| 27410    | 5 3.3  | \$99,664.00 | 8            |              |      |
| 27455    | 5      | 2.7         | \$124,959.00 | 4.4          |      |
| 27282    | 4      | 2.4         | \$104,299.00 | 7.3          |      |
| Davie    | 27006  | 8           | 2.2          | \$102,253.00 | 3.8  |
| 27028    | 19     | 3.2         | \$70,100.00  | 18           |      |
| Iredell  | 28115  | 2           | 2            | \$87,806.00  | 9.5  |
| 28166    | 5      | 5           | \$91,974.00  | 6.8          |      |
| 28625    | 10     | 3           | \$73,479.00  | 11.6         |      |
| 28634    | 2      | 1.2         | \$65,883.00  | 17.5         |      |
| 28660    | 2      | 4.3         | \$71,193.00  | 5.7          |      |
| 28677    | 12     | 4.7         | \$65,210.00  | 16.5         |      |
| 28689    | 1      | 3.8         | \$69,193.00  | 12.5         |      |
| Catawba  | 28601  | 3           | 3.6          | \$85,996.00  | 12.1 |
| 28602    | 4      | 3.9         | \$64,050.00  | 18.1         |      |
| 28613    | 2      | 4.9         | \$68,372.00  | 13.1         |      |
| 28650    | 2      | 1.8         | \$71,349.00  | 13.4         |      |

|                |       |     |             |             |      |
|----------------|-------|-----|-------------|-------------|------|
| 28658          | 4     | 3   | \$70,927.00 | 10          |      |
| Rowan          | 27054 | 1   | 2           | \$92,078.00 | 0.6  |
| 28023          | 2     | 4.1 | \$69,483.00 | 14.9        |      |
| 28138          | 1     | 4.2 | \$67,168.00 | 16          |      |
| 28144          | 3     | 5.5 | \$72,145.00 | 23.7        |      |
| 28146          | 3 3.3 |     | \$75,962.00 | 13.6        |      |
| 28147          | 4 3.9 |     | \$68,615.00 | 17.4        |      |
| Stokes         | 27019 | 2   | 1.6         | \$77,296.00 | 13.9 |
| 27021          | 9 2.9 |     | \$73,217.00 | 13.7        |      |
| 27022          | 1 0.7 |     | \$58,844.00 | 13.8        |      |
| 27042          | 1     | 0   | \$65,293.00 | 0           |      |
| 27046          | 2     | 3.9 | \$54,212.00 | 15.1        |      |
| 27052          | 3     | 4   | \$59,070.00 | 19.8        |      |
| 27043          | 2     | 3.6 | \$83,306.00 | 11.5        |      |
| Yadkin         | 27011 | 1   | 1.2         | \$61,239.00 | 12.4 |
| 27018          | 5     | 2.2 | \$78,060.00 | 14.8        |      |
| 27020          | 7     | 3.2 | \$68,721.00 | 16.8        |      |
| 27055          | 7     | 3.9 | \$72,695.00 | 12.9        |      |
| 28642          | 1     | 1.8 | \$58,027.00 | 18.4        |      |
| Wilkes         | 28606 | 2   | 1.8         | \$53,597.00 | 11.8 |
| 28624          | 2     | 2.1 | \$62,520.00 | 17.3        |      |
| 28635          | 1     | 1.1 | \$50,544.00 | 22.8        |      |
| 28651          | 1     | 4.1 | \$58,852.00 | 16          |      |
| 28654          | 1     | 0   | \$64,517.00 | 10.1        |      |
| 28659          | 7     | 4.3 | \$59,836.00 | 19.9        |      |
| 28665          | 1     | 1.4 | \$54,944.00 | 20.3        |      |
| 28670          | 2     | 3.1 | \$70,373.00 | 7.2         |      |
| 28697          | 2     | 2.9 | \$65,614.00 | 17.7        |      |
| Surry          | 27017 | 6   | 2.4         | \$75,637.00 | 10.2 |
| 27030          | 14    | 2.3 | \$60,276.00 | 19.4        |      |
| 27041          | 3     | 4   | \$70,741.00 | 15.3        |      |
| 27053          | 1     | 4.6 | \$83,932.00 | 13          |      |
| 28621          | 2     | 3.1 | \$66,616.00 | 13.7        |      |
| Other Counties | 28792 | 1   | 1.3         | \$62,788.00 | 14.8 |
| 28711          | 1     | 1   | \$80,676.00 | 6.9         |      |
| 28684          | 1     | 2.3 | \$59,358.00 | 8.6         |      |
| 28681          | 4     | 2.5 | \$69,838.00 | 11          |      |
| 28678          | 3     | 2.2 | \$87,850.00 | 10.9        |      |
| 28657          | 2     | 1.9 | \$59,266.00 | 12.1        |      |
| 28655          | 2     | 4.1 | \$62,935.00 | 21.2        |      |
| 28645          | 4     | 3.6 | \$58,151.00 | 13.7        |      |

|       |       |             |              |      |
|-------|-------|-------------|--------------|------|
| 28643 | 1     | 2           | \$62,878.00  | 12   |
| 28638 | 2     | 1.9         | \$60,666.00  | 16   |
| 28636 | 1     | 4.5         | \$63,001.00  | 19.3 |
| 28630 | 1 4   | \$74,731.00 | 12           |      |
| 28631 | 1 2.1 | \$55,567.00 | 25.8         |      |
| 28622 | 1     | 5.3         | \$49,438.00  | 22.3 |
| 28617 | 1     | 0           | \$46,918.00  | 20.6 |
| 28612 | 2     | 3.6         | \$73,156.00  | 12.8 |
| 28607 | 1     | 6.7         | \$68,174.00  | 33.2 |
| 28605 | 1     | 1.9         | \$91,129.00  | 9.1  |
| 28604 | 2     | 3.7         | \$86,561.00  | 11.1 |
| 28168 | 2     | 2.9         | \$67,050.00  | 11.4 |
| 28152 | 1     | 4.3         | \$64,177.00  | 20.3 |
| 28092 | 2     | 3.4         | \$69,878.00  | 13.6 |
| 28027 | 1     | 2.7         | \$107,779.00 | 7.6  |
| 27834 | 1     | 6.1         | \$64,197.00  | 25.9 |
| 27025 | 2     | 1.1         | \$68,968.00  | 16.9 |
| 27048 | 1     | 4.5         | \$67,148.00  | 12   |
| 27203 | 5     | 3.9         | \$47,336.00  | 24.9 |
| 27205 | 5     | 1.6         | \$71,642.00  | 13.3 |
| 27215 | 1     | 3           | \$80,122.00  | 11.5 |
| 27217 | 2     | 4.1         | \$59,101.00  | 18.9 |
| 27248 | 3     | 6.7         | \$60,545.00  | 7.5  |
| 27288 | 2 4.2 | \$60,842.00 | 17.1         |      |
| 27289 | 1 N/A | N/A         | N/A          |      |
| 27298 | 3     | 4.8         | \$61,105.00  | 14.1 |
| 27306 | 1     | 2.2         | \$62,222.00  | 9.9  |
| 27317 | 2     | 2.5         | \$63,960.00  | 19   |
| 27320 | 2     | 3.5         | \$58,318.00  | 19.6 |
| 27341 | 2     | 3.6         | \$64,002.00  | 6.8  |
| 27350 | 1     | 2.7         | \$68,664.00  | 18.1 |
| 27370 | 5     | 2.1         | \$77,541.00  | 9    |
| 28206 | 1     | 3.7         | \$55,925.00  | 23.6 |
| 28213 | 1     | 3           | \$66,830.00  | 18.2 |
| 28301 | 1     | 7.3         | \$42,000.00  | 33.5 |
| 28348 | 1     | 3.4         | \$73,840.00  | 13.8 |
| 28374 | 1     | 2           | \$129,453.00 | 4.2  |
| 28540 | 1     | 3.8         | \$66,485.00  | 15.6 |
| 28543 | 1     | 3.6         | \$43,472.00  | 14.6 |
